# Supplementary material for: Analysis of monomeric Aβ (1–40) peptide by capillary electrophoresis
Source: Royal Society of Chemistry journal article supplement (doi:10.1039/c0an00080a), 2010-01-01
Supplement: c0an00080a.pdf [file c0an00080a.pdf]

# Supplementary Information for:

## ***Analysis of Monomeric A $\beta$ (1-40) Peptide by Capillary Electrophoresis***

Ryan Picou,<sup>a</sup> Julia P. Moses,<sup>a</sup> Amber D. Wellman,<sup>b</sup> Indu Kheterpal,<sup>c</sup>  
and S. Douglass Gilman<sup>\*a</sup>

<sup>a</sup>*Department of Chemistry, Louisiana State University, Baton Rouge, LA 70803*

<sup>b</sup>*Department of Chemistry, University of Tennessee, Knoxville, TN 37996-1600, USA*

<sup>c</sup>*Pennington Biomedical Research Center, Louisiana State University System, Baton Rouge, LA 70808, USA*

# Supplementary Figure 1

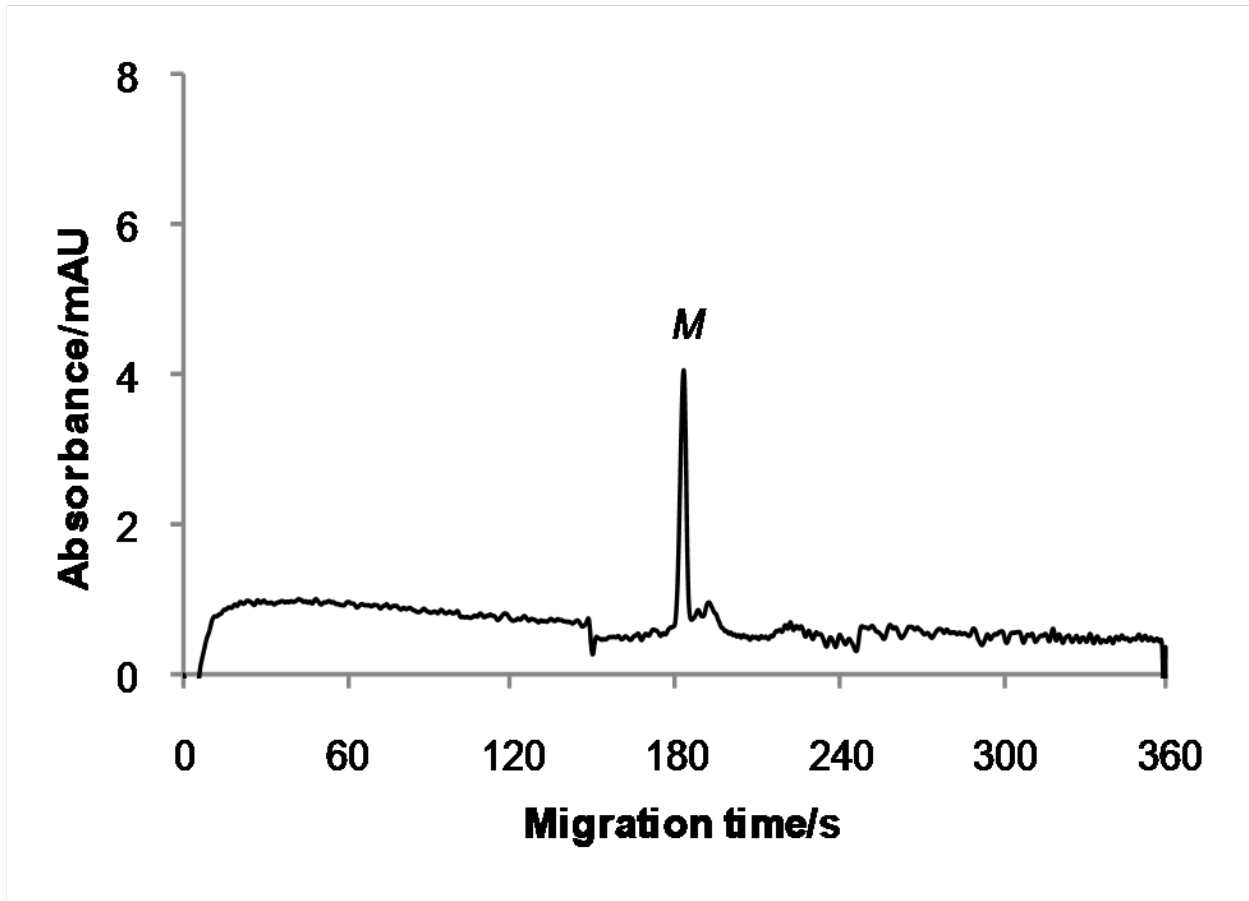

- Electropherogram is identical to that presented in Figure 2a, but plotted vs. time (x-axis) instead of electrophoretic mobility.

## Supplementary Figure 2

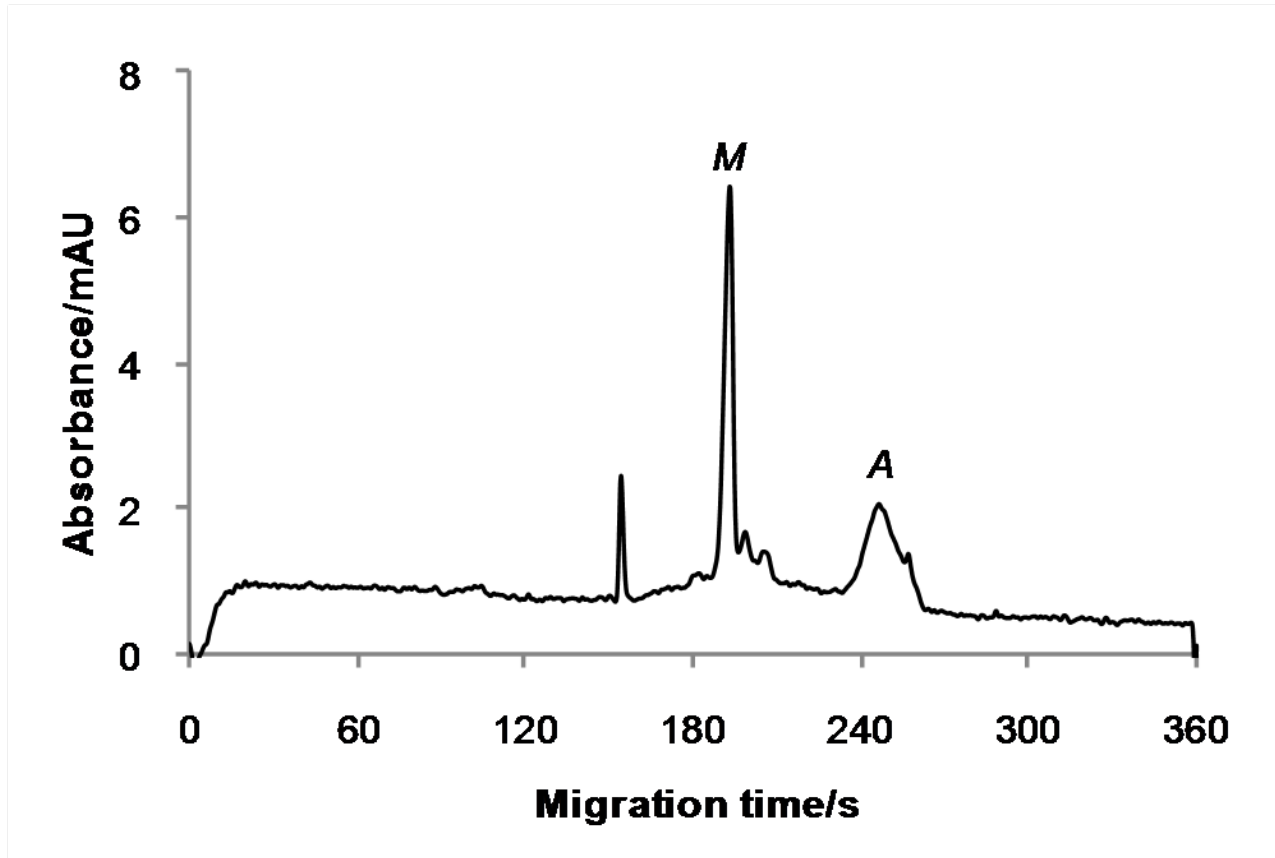

- Electropherogram is identical to that presented in Figure 2b, but plotted vs. time (x-axis) instead of electrophoretic mobility.
